# Supplementary material for: Actin depolymerization is able to increase plant resistance against pathogens via activation of salicylic acid signalling pathway
Source: PubMed Central journal article supplement (PMC6639534; doi:10.1038/s41598-019-46465-5), 2019-07-18
Supplement: 41598_2019_46465_MOESM1_ESM.pdf [file 41598_2019_46465_MOESM1_ESM.pdf]

## SUPPLEMENTARY INFORMATION

# **Actin depolymerization is able to increase plant resistance against pathogens via activation of salicylic acid signalling pathway**

Hana LEONTOVYČOVÁ<sup>1,2,4</sup>, Lucie TRDÁ<sup>2</sup>, Tetiana KALACHOVA<sup>2</sup>, Lucie LAMPAROVÁ<sup>1,2</sup>, Romana POSPÍCHALOVÁ<sup>2</sup>, Petre I. DOBREV<sup>3</sup>, Kateřina MALÍNSKÁ<sup>3</sup>, Lenka BURKETOVÁ<sup>2</sup>, Olga VALENTOVÁ<sup>1</sup>, Martin JANDA<sup>1,2</sup>

<sup>1</sup> Laboratory of Plant Biochemistry, Department of Biochemistry and Microbiology, University of Chemistry and Technology Prague, Technická 5, 166 28 Prague 6, Czech Republic

<sup>2</sup> Laboratory of Pathological Plant Physiology, Institute of Experimental Botany of The Czech Academy of Sciences, Rozvojova 263, 165 02, Prague 6, Czech Republic

<sup>3</sup> Laboratory of Hormonal Regulations in Plants Institute of Experimental Botany of The Czech Academy of Sciences, Rozvojova 263, 165 02, Prague 6, Czech Republic

<sup>4</sup> Department of Biochemistry, Faculty of Science, Charles University in Prague, Faculty of Science, 128 44 Hlavova 2030/8, Prague 2, Czech Republic

# FIGURE S1

24 h

DMSO

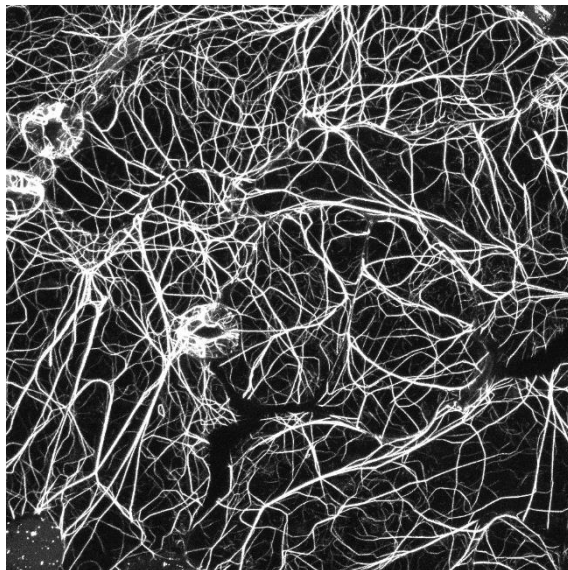

latB

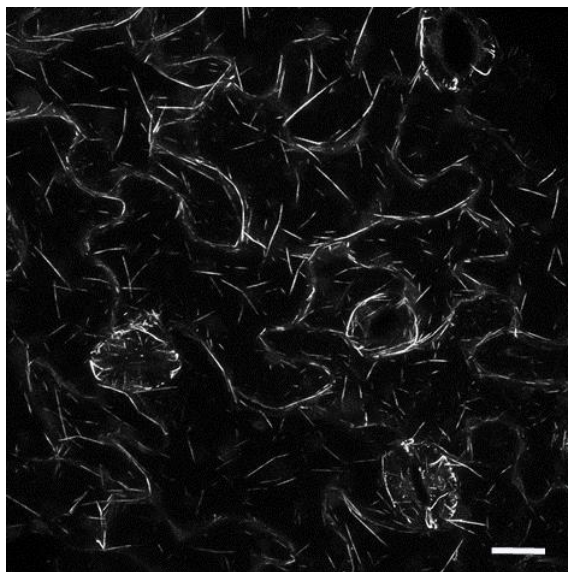

**Fig. S1. Latrunculin B disrupts actin filaments in *A. thaliana* seedlings.** Microscopy images (maximum intensity projections) of *pUBC::Lifeact-GFP A. thaliana* seedlings treated with 200 nM latrunculin B or 0.01% DMSO (control) for 24 h. The bar corresponds to 20  $\mu\text{m}$ .

# FIGURE S2

**A**

DMSO  
0.05%

latB  
0.2 $\mu$ M

latB  
1 $\mu$ M

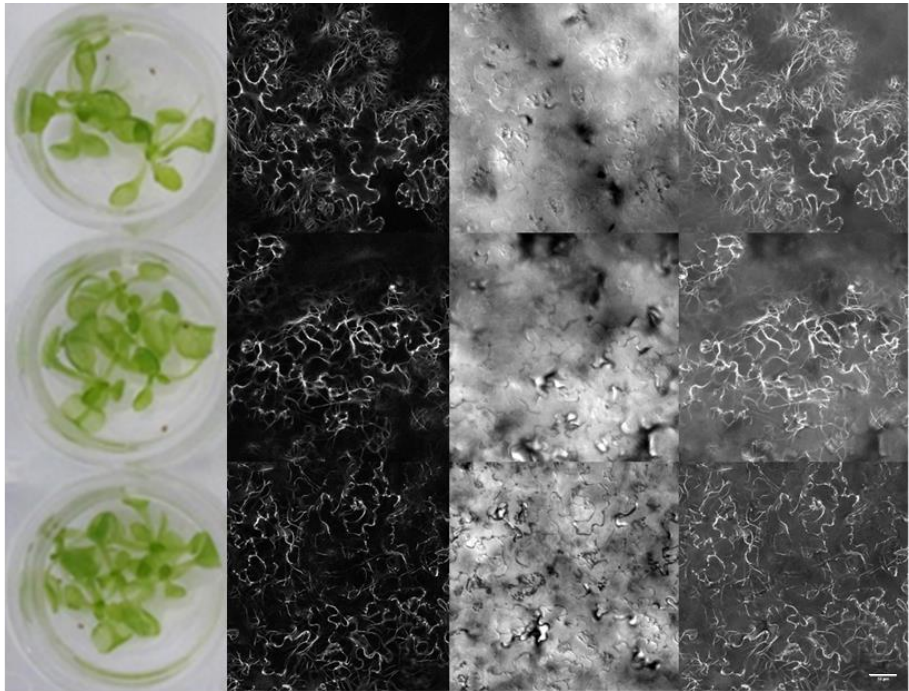

fluorescence

bright field

merged

**B**

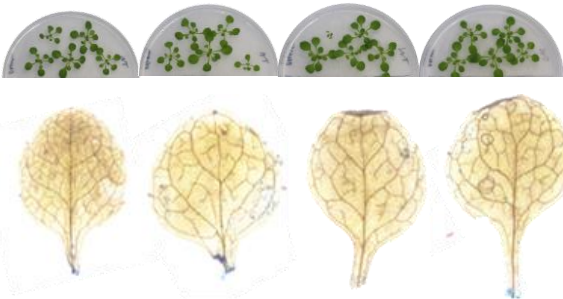

**C**

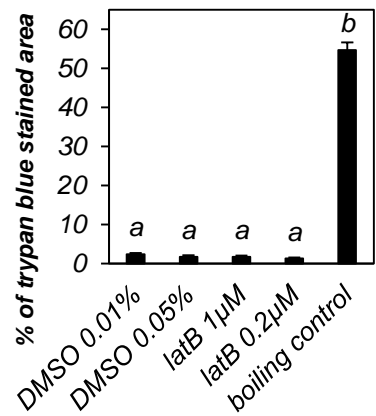

**Fig. S2. Latrunculin B does not induce cell death in *A. thaliana* seedlings.** **A)** Eleven days old seedlings of 35S::lifeAct-GFP were grown in MS liquid medium at 10h/14h light cycle and treated with latB for 24 h by replacing cultivation media with LanB-containing one; DMSO in appropriate concentrations was used as a control. Photos of the seedlings and microscopic images of GFP-fluorescence and bright field channels. Scale bar corresponds to 10 $\mu$ m **B)** Fourteen days old seedlings grown on MS/2 agar plates at 10h/14h light cycle were treated with latB for 24h by flooding, DMSO with appropriate concentration and boiling of leaf tissues for 5 min at 100°C were used as controls. Photos of the seedling growth on plates after LanB treatment and images of trypan-blue stained leaf tissues; **C)** quantification of trypan blue stained area. Data are presented in means  $\pm$ SE, different letters mean significant difference between treatments, two-tailed *t*-test.

# FIGURE S3

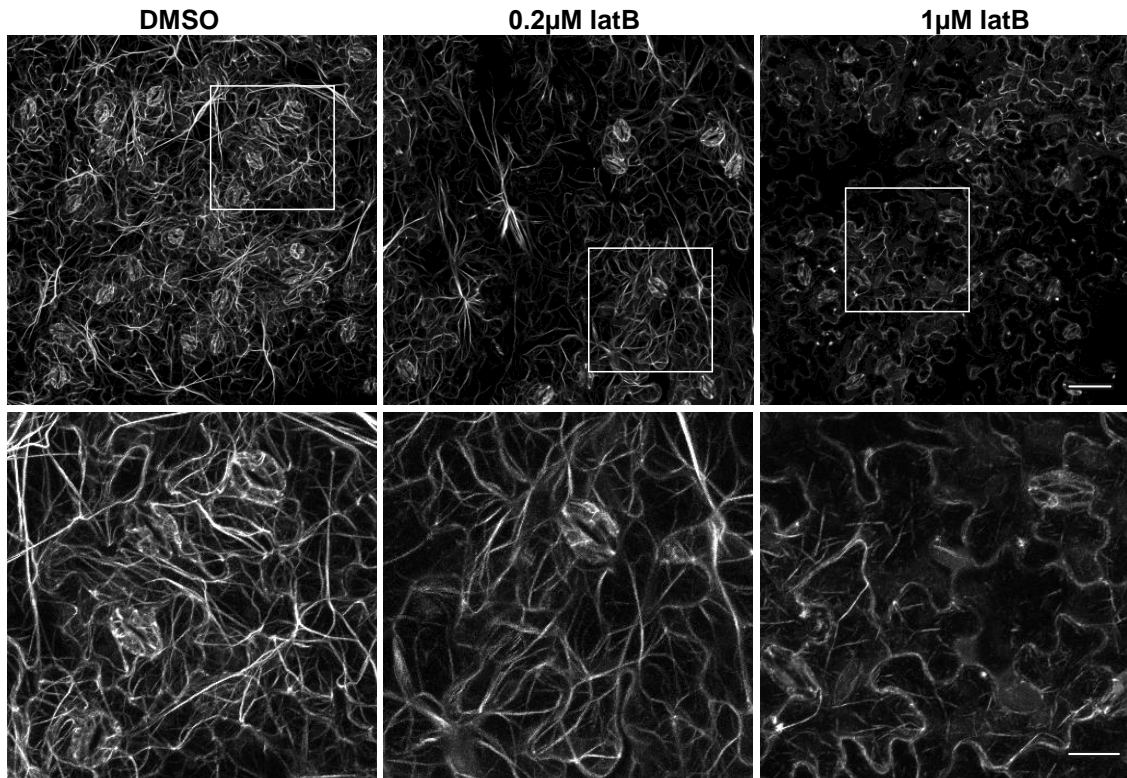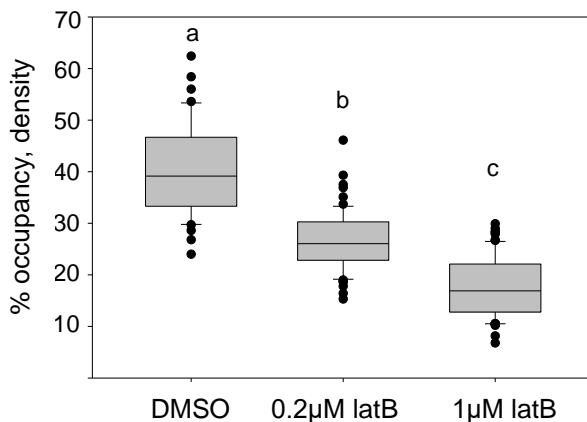

24 h

**Fig. S3. Latrunculin B disrupts actin filaments in four-week-old *A. thaliana*.** Microscopy images (maximum intensity projections) of *pUBC::Lifeact-GFP* four-week-old *A. thaliana* plants treated for 24 h with either latrunculin B (0.2  $\mu$ M or 1  $\mu$ M) or 0.05% DMSO (control). White squares in the upper row indicate borders of the presented details (lower row). The bars correspond to 50  $\mu$ m and 20  $\mu$ m, respectively. Degree of actin depolymerisation is quantified as the percent of occupancy of GFP signal in image. Statistical differences between the samples were assessed using a one-way ANOVA, with a Tukey honestly significant difference (HSD) multiple mean comparison post hoc test. Different letters indicate a significant difference, Tukey HSD,  $P < 0.001$ ,  $n=43$  to 72.

# FIGURE S4

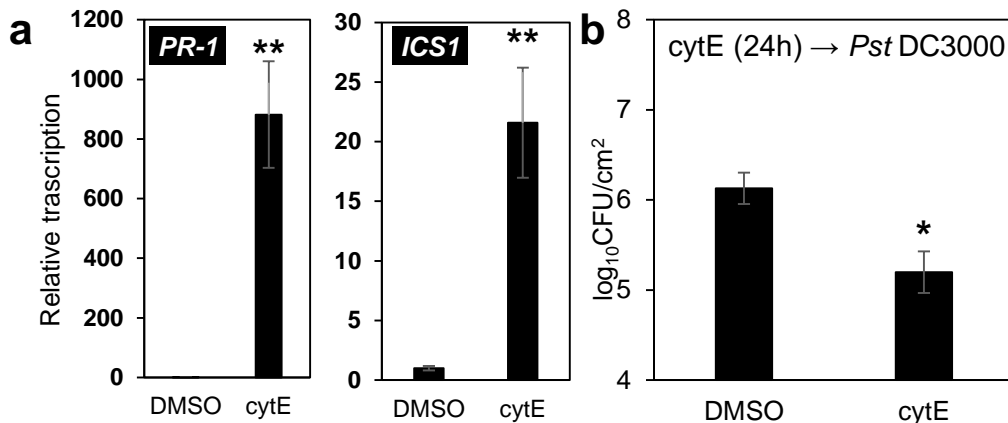

**Fig. S3. Cytochalasin E induces SA-dependent gene transcription and resistance to *Pst* DC3000 in four-week-old *A. thaliana* plants.** **a)** Transcription of SA marker genes *PR-1* and *ICS1* in four-week-old *A. thaliana* plants. Plants were treated for 24 h with 10  $\mu$ M cytochalasin E (cytE). The transcription level was normalized to the reference gene, *TIP41*. **b)** Bacterial titres in four-week-old plants. Plants were pretreated with 10  $\mu$ M cytE for 24 h before treatment with *Pst* DC3000. Control plants were treated with DMSO (0.25%). Tissue was harvested 3 days after inoculation with *Pst* DC3000. The values represent mean and error bars (SEM) from four independent samples. The asterisks represent statistically significant changes in the cytE-treated samples compared with controls (\*  $P < 0.05$ ; \*\*  $P < 0.01$ ; two tailed Student's t-test).

# FIGURE S5

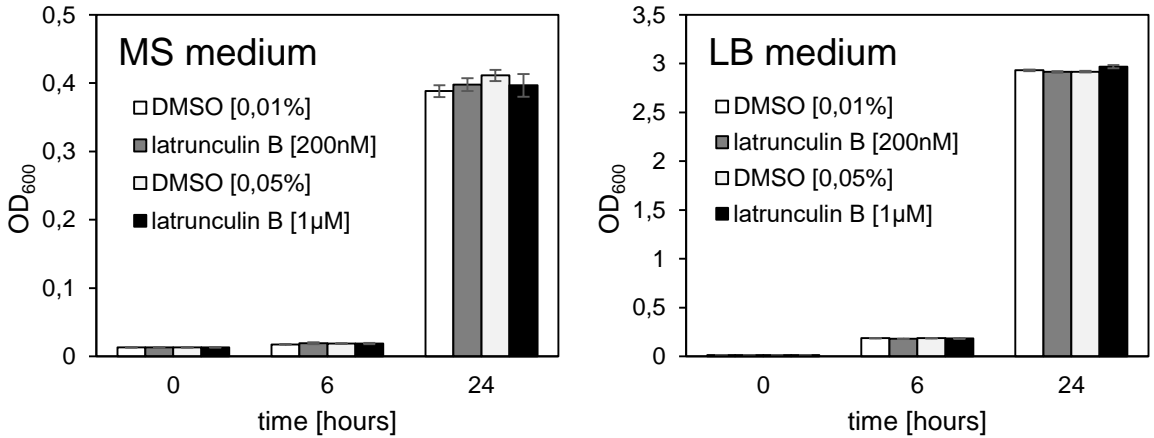

**Fig. S4. Cytoskeletal drugs have no effect on the growth of *Pst* DC3000 *in vitro*.**

Growth of *Pst* DC3000 in LB medium and MS medium. The media contained 0.2, 1 or 10 µM latrunculin B. As controls, 0.01, 0.05 or 0.5% DMSO was used. The values represent mean and error bars (SEM) from four independent samples.

# FIGURE S6

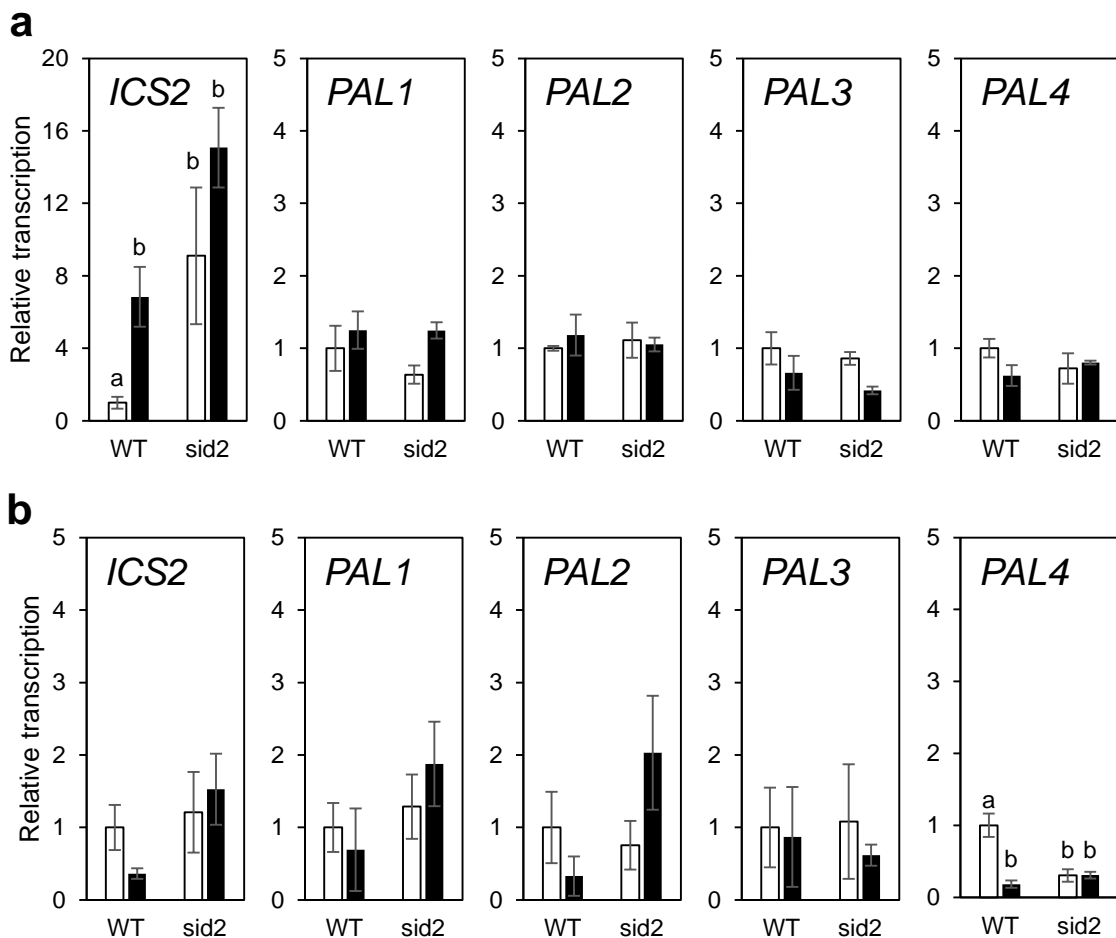

**Fig. S6 Transcriptional analysis of SA biosynthetic genes after latrunculin B treatment.** Seedlings were grown *in vitro* in liquid MS medium (a) and adult plants grown in soil for 4 weeks (b). Seedlings were treated for 24 h with 200 nM latrunculin B (latB) or 0.01% DMSO (control). 4-week-old plants were treated for 24 h with 1  $\mu$ M latrunculin B (latB) or 0.05% DMSO (control). Transcription of SA biosynthetic genes *ICS2*, *PAL1*, *PAL2*, *PAL3* and *PAL4*. The transcription level was normalized to the reference genes, *SAND* (seedlings) and *TIP41* (4 week old plants). The values represent mean and error bars (SEM) from four independent samples. Statistical differences between the samples were assessed using a one-way ANOVA, with a Tukey honestly significant difference (HSD) multiple mean comparison post hoc test. Different letters indicate a significant difference, Tukey HSD,  $P < 0.05$ ,  $n=4$ .

# FIGURE S7

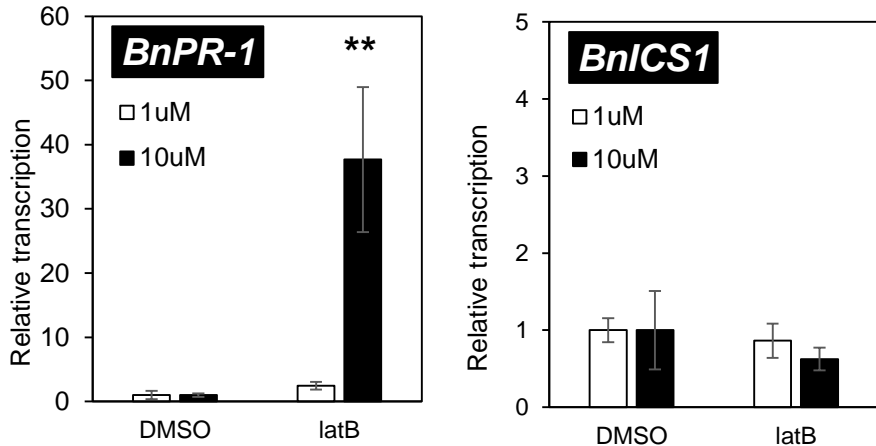

**Fig. S7 Transcription of *BnPR-1* and *BnICS1* 72 h after latrunculin B treatment in *Brassica napus*.** Cotyledons were treated for 72 h with infiltrations of 0.2, 1 or 10  $\mu$ M latrunculin B (latB). Control cotyledons were treated for 72 h with a corresponding concentration of DMSO (0.05 or 0.5%). The transcription level was normalized to the reference gene, *BnTIP41*. The asterisks represent statistically significant changes in the latB-treated samples compared with controls (\*\*  $P < 0.01$ ; two tailed Student's t-test).



## FIGURE S8

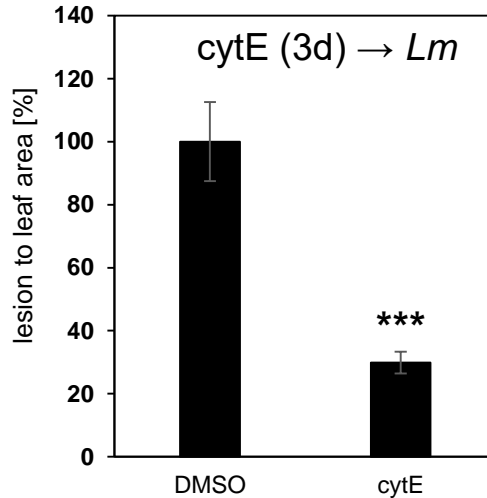

**Fig. S5. Cytochalasin E induces resistance of *B. napus* to *L. maculans*.**

Plant resistance was evaluated as relative lesion area (ratio of lesion area to whole leaf area) on the cotyledons. Cotyledons were treated with 10  $\mu$ M cytochalasin E (cytE) or 0.25% DMSO (control) 3 days before inoculation with *L. maculans*. Lesions of DMSO controls in each treatment conditions were set as 100%. Data correspond to means  $\pm$  SEM. The asterisks represent statistically significant changes in the cytE-treated samples compared with controls (\*\*\*)  $P < 0.001$ ; two tailed Student's t-test).

# FIGURE S9

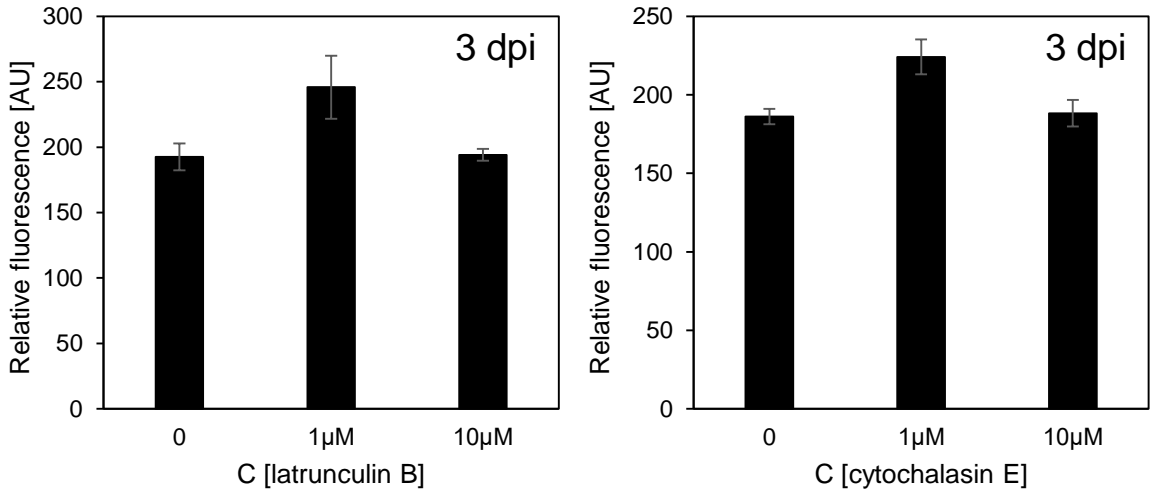

**Fig. S6. Cytoskeletal drugs have no effect on the growth of *L. maculans in vitro*.**

Growth of GFP-tagged *L. maculans* conidia in Gamborg medium supplemented with 1 or 10 μM latrunculin B, 1 or 10 μM cytochalasin E or 0.5% DMSO measured at 3 dpi. The values represent mean and error bars (SEM) from eight independent samples. Based on the performed t-test data are not statistically significant differentiated.

**Table S1 Concentrations of phytohormones in *A. thaliana* seedlings**

|          | DMSO                 |      | 200 nM latrunculin B |      | TTEST<br>(p value) |
|----------|----------------------|------|----------------------|------|--------------------|
|          | MEAN<br>[pmol/g(FW)] | SE   | MEAN<br>[pmol/g(FW)] | SE   |                    |
| ABA      | 4.2                  | 0.53 | 4.3                  | 0.36 | 0.85               |
| DPA      | 8.6                  | 2.4  | 11.8                 | 0.55 | 0.23               |
| PA       | 0.66                 | 0.49 | 0.96                 | 0.31 | 0.61               |
| ABA-GE   | 3.7                  | 1.3  | 2.9                  | 2.5  | 0.80               |
| 9OH-ABA  | 0.13                 | 0.07 | 0.12                 | 0.08 | 0.98               |
| IAA      | 43.2                 | 6.2  | 35.1                 | 2.5  | 0.27               |
| IAA-Asp  | 12.4                 | 1.1  | 13.0                 | 0.55 | 0.69               |
| IA-GLU   | 21.2                 | 0.62 | 20.6                 | 1.8  | 0.76               |
| OxIAA    | 169                  | 23.0 | 197                  | 19.9 | 0.39               |
| OxIAA-GE | 986                  | 273  | 760                  | 106  | 0.47               |
| IAA-GE   | 17.8                 | 1.2  | 14.4                 | 2.3  | 0.24               |
| PAA      | 27.2                 | 1.4  | 27.9                 | 2.0  | 0.79               |
| IAM      | 2.9                  | 0.74 | 0.89                 | 0.35 | 0.047              |
| IAN      | 19264                | 2169 | 18588                | 2301 | 0.84               |
| SA       | 154                  | 28.6 | 1109                 | 153  | 0.0008             |
| BzA      | 488                  | 37.8 | 496                  | 45.8 | 0.91               |
| JA       | 112                  | 28.1 | 253                  | 28.3 | 0.012              |
| JA-Ileu  | 20.3                 | 7.0  | 32.4                 | 7.8  | 0.29               |
| cisOPDA  | 140                  | 26.8 | 164                  | 18.2 | 0.49               |
| GA19     | 1.1                  | 0.36 | 0.49                 | 0.22 | 0.18               |

Abbreviations: IAA = indole-3-acetic acid; IAA-GE = IAA-glucose ester; IAA-Ala = IAA-alanine; IAA-Asp = IAA-aspartate; IAA-Glu = IAA-glutamate; IAA-Leu = IAA-leucine; IAA-Trp = IAA-tryptophane; IAA-Val = IAA-valine; IAA-PHE = IAA-Phenylalanine; OxIAA = oxo-IAA; OxIAA-GE = oxo-IAA-glucose ester; IAM = Indole-3-acetamide; IAN = Indole-3-acetonitrile (IAA precursor); 4Cl-IAA = 4-chloro-IAA; IPyA = indolepyruvic acid; 2,4-D = 2,4 dichlorophenoxyacetic acid; 2,4,5-T = 2,4,5 trichlorophenoxyacetic acid; IBA = indole-3-butyric acid; NAA = 1-Naphtaleneacetic acid; ABA = abscisic acid; ABA-GE = ABA-glucose ester; PA = phaseic acid; DPA = dihydrophaseic acid; 7OH-ABA = 7-hydroxy-ABA; 9OH-ABA = 9-hydroxy-ABA; NeOPA = Neophaseic acid; SA = salicylic acid; BzA = Benzoic acid; PAA = Phenylacetic acid; GAn = Gibberellin n=1,3,4,7,8,19,20,29; Strigol; JA = jasmonic acid; JA-Ile = JA-isoleucine; cisOPDA (JA precursor).

**Table S2 List of primers used for qPCR**

| GENE           | ACCESSION |    | SEQUENCE (5' to 3')        | REFERENCE |
|----------------|-----------|----|----------------------------|-----------|
| <i>AtSAND</i>  | AT2G28390 | FP | CTGTCTTCTCATCTCTTGTCT      | 1         |
|                |           | RP | TCTTGCAATATGGTTCTCTG       |           |
| <i>AtTIP41</i> | AT4G34270 | FP | GTGAAAACCTGTTGGAGAGAAGCAA  | 2         |
|                |           | RP | TCAACTGGATACCCTTTTCGCA     |           |
| <i>AtPR-1</i>  | AT2G14610 | FP | AGTTGTTTTGGAGAAAAGTCAG     | 1         |
|                |           | RP | GTTACATAATTCCCACGA         |           |
| <i>AtPR-2</i>  | AT3G57260 | FP | TATAGCCACTGACACCAC         | 3         |
|                |           | RP | GCCAAGAAACCTATCACTG        |           |
| <i>AtICS1</i>  | AT1G74710 | FP | GCAAGAATCATGTTCCCTACC      | 1         |
|                |           | RP | AATTATCCTGCTGTTACGAG       |           |
| <i>AtICS2</i>  | AT1G18870 | FP | TGTCTTCAAAGTCTCCTCTG       | 1         |
|                |           | RP | CTTCCTCCAAACTCATCAAAC      |           |
| <i>AtPAL1</i>  | AT2G37040 | FP | TAGTAGTGATTGGGTTATGGAG     | 1         |
|                |           | RP | GTGGCTTGTTCCTTCGT          |           |
| <i>AtPAL2</i>  | AT3G53260 | FP | AGCAGTGATTGGGTTATGG        | 1         |
|                |           | RP | ATGTCTCCTTCGTGTTTCC        |           |
| <i>AtPAL3</i>  | AT5G04230 | FP | GTGTGAAGGCGAGTAGTG         | 1         |
|                |           | RP | GAAGCGTGTTCGACCTGT         |           |
| <i>AtPAL4</i>  | AT3G10340 | FP | GCTCAACTTCTCCACGAAAT       | 1         |
|                |           | RP | CGACACATCTATCAAAGGGTT      |           |
| <i>BnTIP41</i> |           | FP | AGAGTCATGCCAAGTTCATGGTT    | 4         |
|                |           | RP | CCTCATAAGCACACCATCAACTCTAA |           |
| <i>BnPR-1</i>  |           | FP | CATCCCTCGAAAGCTCAAGAC      | 5         |
|                |           | RP | CCACTGCACGGGACCTAC         |           |
| <i>BnICS1</i>  |           | FP | CAAACCTCATCATCTTCCCTC      | 5         |
|                |           | RP | AGCGTGACTTACTAACCAG        |           |

- 1 Sasek, V. *et al.* Constitutive salicylic acid accumulation in pi4klIIIbeta1beta2 Arabidopsis plants stunts rosette but not root growth. *New Phytol* **203**, 805-816, doi:10.1111/nph.12822 (2014).
- 2 Czechowski, T., Stitt, M., Altmann, T., Udvardi, M. K. & Scheible, W. R. Genome-wide identification and testing of superior reference genes for transcript normalization in Arabidopsis. *Plant Physiol* **139**, 5-17, doi:10.1104/pp.105.063743 (2005).
- 3 Matouskova, J. *et al.* Changes in actin dynamics are involved in salicylic acid signaling pathway. *Plant Sci* **223**, 36-44, doi:10.1016/j.plantsci.2014.03.002 (2014).
- 4 Chen, X., Truksa, M., Shah, S. & Weselake, R. J. A survey of quantitative real-time polymerase chain reaction internal reference genes for expression studies in Brassica napus. *Anal Biochem* **405**, 138-140, doi:10.1016/j.ab.2010.05.032 (2010).
- 5 Sasek, V. *et al.* Recognition of avirulence gene AvrLm1 from hemibiotrophic ascomycete *Leptosphaeria maculans* triggers salicylic acid and ethylene signaling in Brassica napus. *Mo. Plant Microbe Interact* **25**, 1238-1250, doi:10.1094/MPMI-02-12-0033-R (2012).
